# Supplementary material for: Conjugation Operons in Gram-Positive Bacteria with and without Antitermination Systems
Source: MDPI journal article supplement (doi:10.3390/microorganisms10030587), 2022-03-08
Supplement: s1 [file s1]

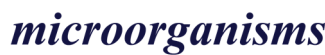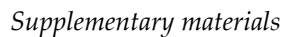

*traF*



tral



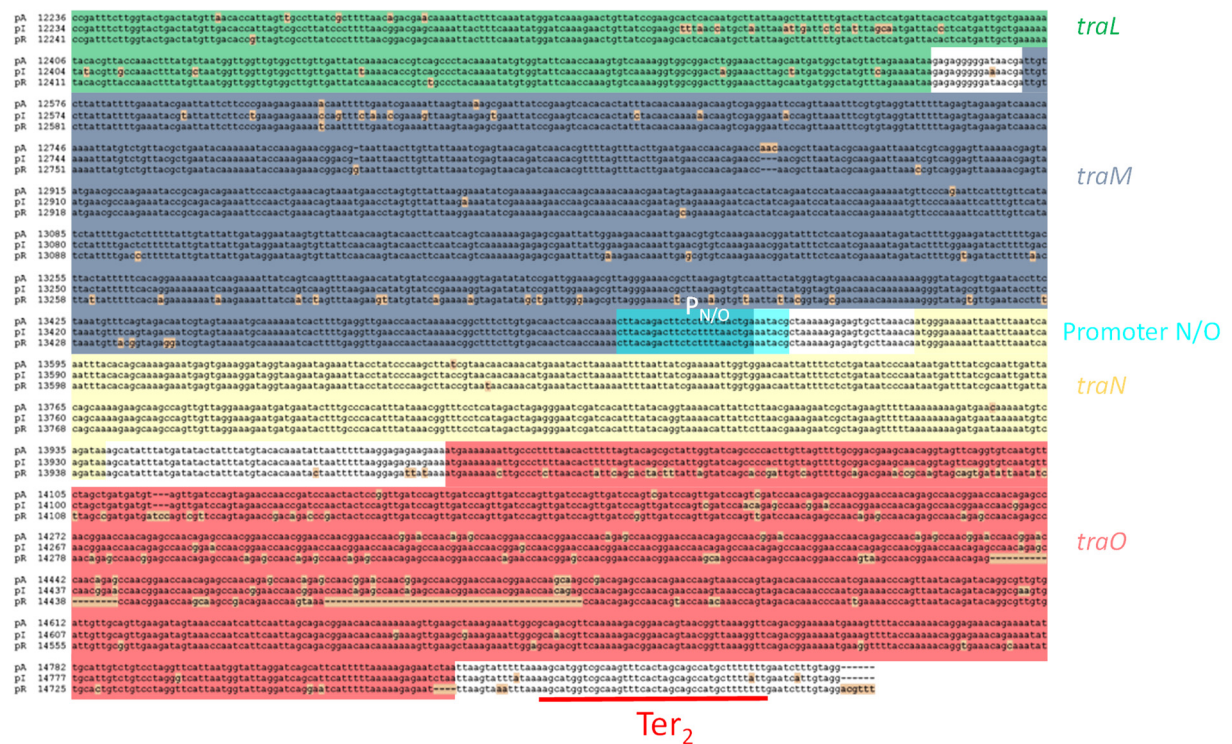

**Figure S1.** Alignment of the DNA sequences of the conjugation operons of Inc18 plasmids pIP501, pAMβ1 and pRE25. Non conserved bp are shown on an orange background. The sequences of the conjugations operons including the upstream promoter and downstream *Ter2* sequences are shown for plasmids pAMβ1 (pA), pIP501 (pI) and pRE25 (pR). Coding DNA sequences of the conjugation genes are indicated with colours and the name of the corresponding gene is given at the right. Positions of the identified putative terminators are indicated with a red line. Promoters *Ptra* and *Pn* are highlighted with a light blue colour.
